# Supplementary material for: A conserved human population of TRAV26+ type II Natural Killer T cells solely recognise CD1d
Source: Research Square preprint supplement (doi:10.21203/rs.3.rs-7004764/v1), 2025-12-05
Supplement: Supplementary file 1 [file 4a1807021797a2073a44a073.pdf]

# Supplementary information

## A conserved human population of TRAV26<sup>+</sup> type II Natural Killer T cells solely recognise CD1d

Kean Chan Yew Poa<sup>1, \*</sup>, Christopher M Harpur<sup>2,3‡, \*</sup>, Tan-Yun Cheng<sup>4</sup>, Elena Batleska<sup>2,3</sup>, Catriona V Nguyen-Robertson<sup>2</sup>, Rajesh Lamichhane<sup>2</sup>, Caroline Soliman<sup>2,ψ</sup>, Scott JJ Reddiex<sup>2</sup>, Christopher Menne<sup>3</sup>, Adam P Uldrich<sup>2</sup>, David B Moody<sup>4</sup>, Jamie Rossjohn<sup>1, 5</sup>, Dale I Godfrey<sup>2</sup>, Daniel G Pellicci<sup>2, 3, 6, #</sup>, Jérôme Le Nours<sup>1, #</sup>, Catarina F Almeida<sup>2, #</sup>

<sup>1</sup>Infection and Immunity Program and Department of Biochemistry and Molecular Biology, Biomedicine Discovery Institute, Monash University, Clayton, Victoria 3800, Australia.

<sup>2</sup>Department of Microbiology & Immunology, Peter Doherty Institute for Infection and Immunity, <sup>6</sup> University of Melbourne, Melbourne, Victoria 3010, Australia.

<sup>3</sup>Infection, Immunity and Global Health, Murdoch Children's Research Institute, Parkville, Victoria 3052, Australia.

<sup>4</sup>Division of Rheumatology, Inflammation, and Immunity, Brigham and Women's Hospital and Harvard Medical School, Boston, MA 02115, United States.

<sup>5</sup>Institute of Infection and Immunity, Cardiff University School of Medicine, Heath Park, Cardiff, CF14 4XN, United Kingdom.

<sup>6</sup>Department of Paediatrics, The University of Melbourne, Melbourne, Victoria 3010, Australia.

<sup>‡</sup>Present address: 21/885 Mountain Hwy, Bayswater VIC 3153

<sup>ψ</sup>Present address: CSL Innovation Pty Ltd., Melbourne, Victoria 3000, Australia

<sup>\*</sup>Joint 1<sup>st</sup> authors

<sup>#</sup>Co-corresponding and joint last authors. Email: catarina.dos@unimelb.edu.au, jerome.lenours@monash.edu, dan.pellicci@mcri.edu.au

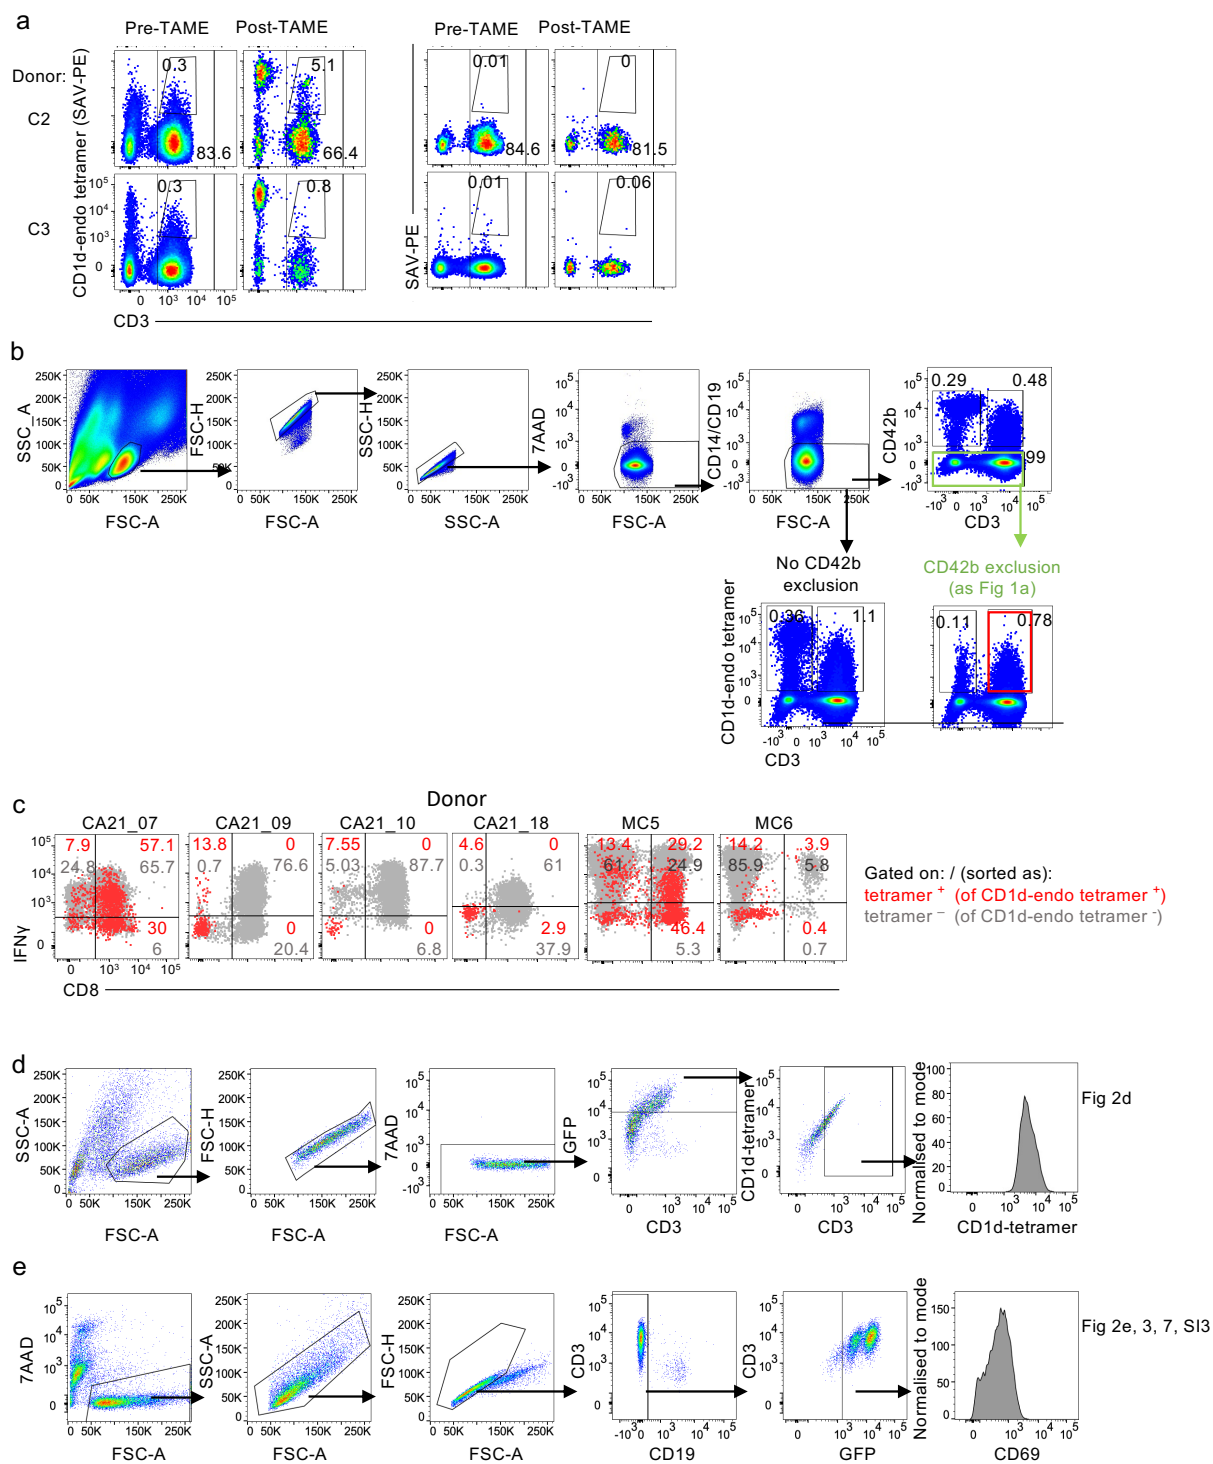

**Fig. S1. (a)** Flow cytometry plots of three donors showing CD3 vs CD1d-endo tetramer and streptavidin (SAV)-PE control staining pre- and post-CD1d-endo tetramer associated magnetic enrichment (TAME), gated on 7AAD<sup>-</sup>CD14<sup>-</sup>CD19<sup>-</sup> single lymphocytes. Data shown is from one experiment, representative of 5 donors acquired over 2 experiments where SAV-PE enrichments were performed alongside CD1d-endo TAME. **(b)** Gating strategy for flow cytometry analysis of CD1d-endo tetramer staining of PBMCs with and without CD42b exclusion gate applied. Data is from donor CH7 and representative of the data graphed in Figures 1 and 2c. **(c)** Overlaid dot plots show CD8 *versus* IFN $\gamma$  on stimulated CD1d-endo tetramer<sup>+</sup> cells (in red, gated as per the red gate in (1d)), stimulated (grey) or unstimulated (black) CD1d-endo tetramer<sup>-</sup> sorted cells. Data shown is from 6 donors, analysed across 4 experiments. **(d)** Gating strategy for flow cytometry analysis of CD1d-tetramer stain TCR reporter lines HEK293T or SKW3. $\beta$ 2m<sup>-/-</sup>. The plot shown is from T26A stained with CD1d-endo tetramer and representative of data in figure 2d. **(e)** Gating strategy for flow cytometry analysis of TCR reporter lines HEK293T or SKW3. $\beta$ 2m<sup>-/-</sup> co-cultures with C1R lines. The plot shown is from NKT15:C1R.wt co-culture in the presence of SM and is representative of a datapoint in Figure 2e.

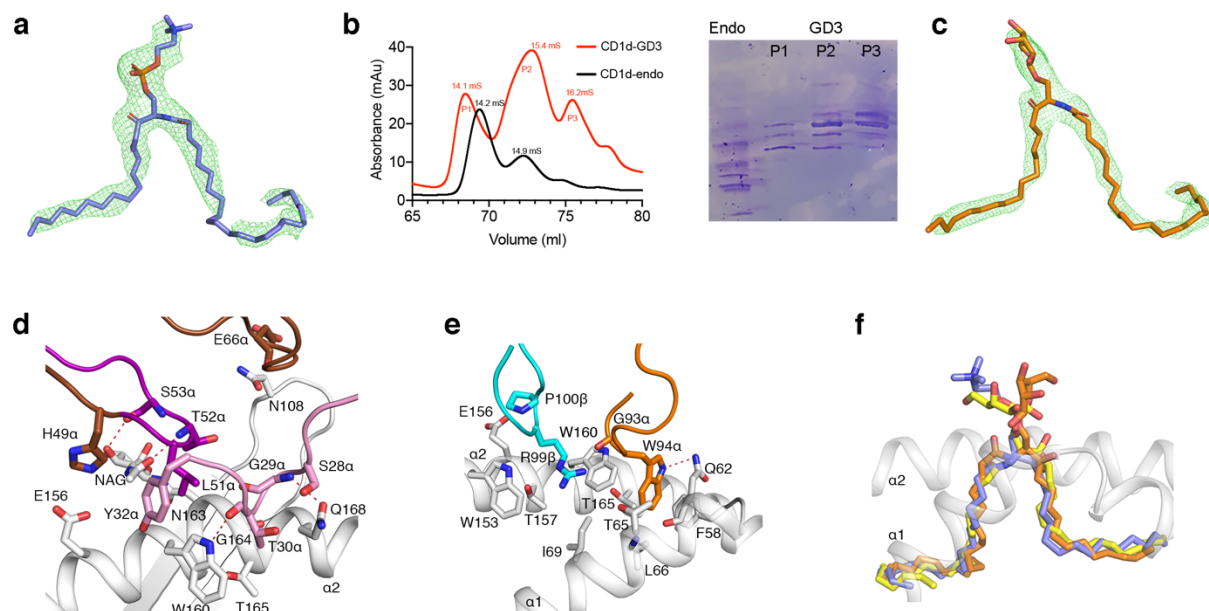

**Fig. S2.** (a) Fo-Fc electron density map of SM contoured at  $2.2\sigma$  level. (b) Anion exchange chromatography profiles of CD1d-endo and CD1d-GD3 and the isoelectric focussing (IEF) gel of CD1d-endo with peaks P1, P2 and P3 of CD1d-GD3 isolated from the anion exchange purification. (c) Fo-Fc electron density map of GD3 (partially modelled) contoured at  $2.2\sigma$  level. (d-e) Molecular interactions of the T26A CDR1 $\alpha$  (pink), CDR2 $\alpha$  (purple), CDR3 $\alpha$  (orange), CDR3 $\beta$  (cyan) and FW $\alpha$  (brown) with CD1d-GD3. (f) Superposition of the CD1d-SM (in light blue, PDB code: 8SGB), the partially modelled CD1d-GD3 (in orange, PDB code: 8SGM) and  $\alpha$ -GalCer (in yellow, PDB code: 1ZT4).

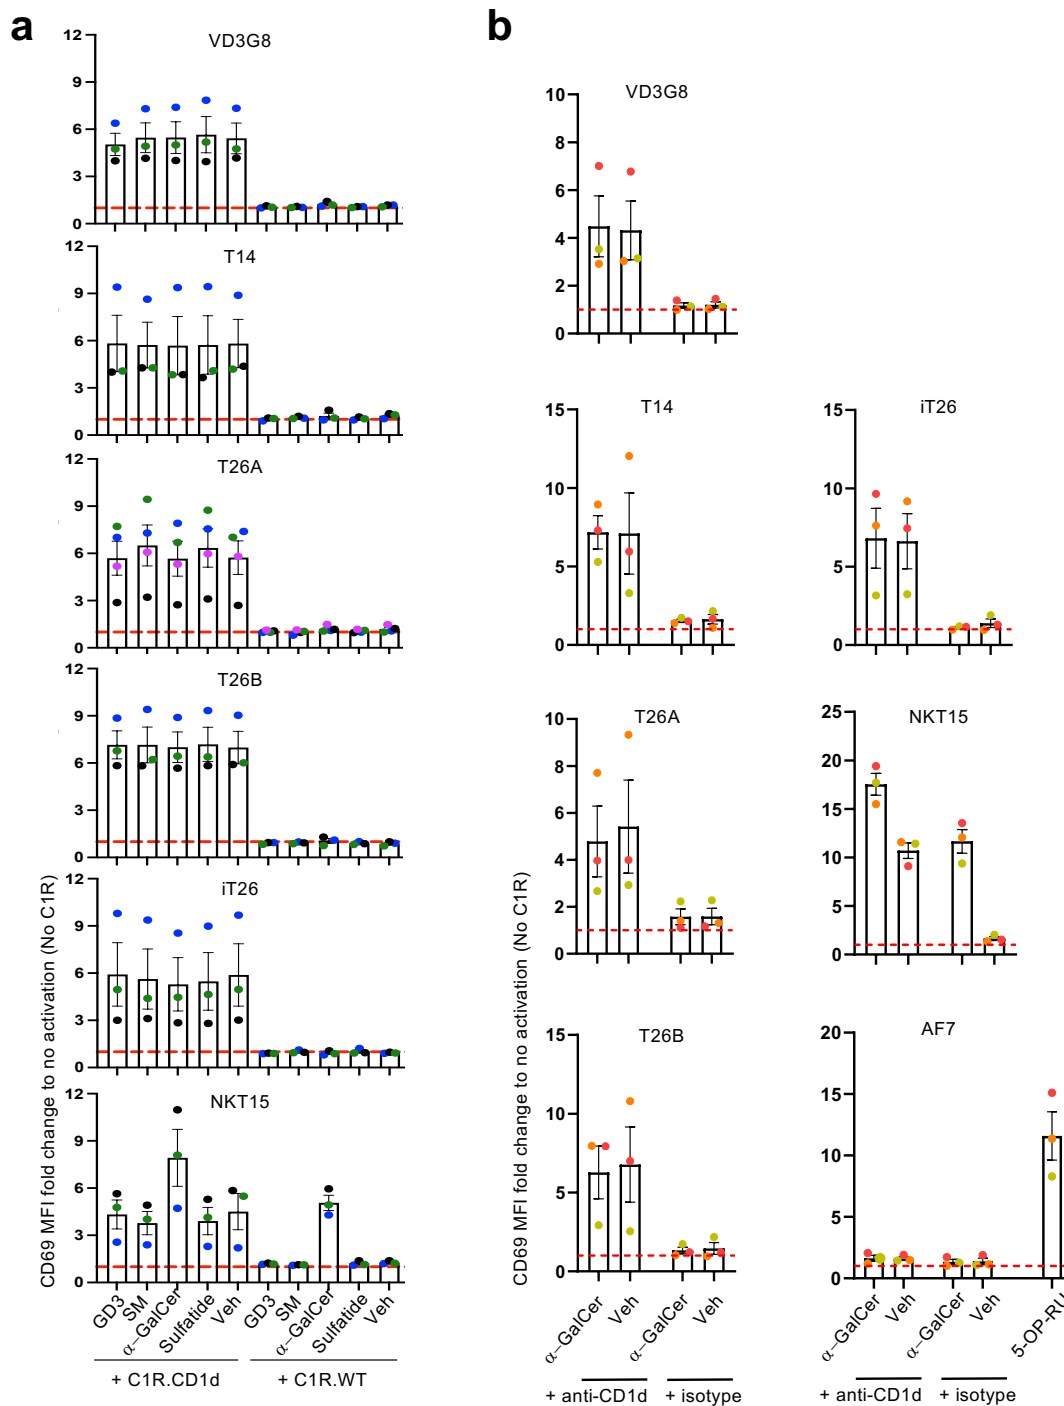

**Fig. S3. (a)** SKW3. $\beta 2m^{-/-}$  TCR-transduced cell lines were co-cultured with wild type C1R cells (C1R.WT) or C1R transduced to express high levels of CD1d (C1R.CD1d) in the presence or absence of GD3, sphingomyelin (SM), sulfatide (all at 20  $\mu\text{g/mL}$ ),  $\alpha$ -GalCer (1  $\mu\text{g/mL}$ ) or vehicle control (Veh). Graphs show fold increase in CD69 mean fluorescence intensity (MFI) relative to co-cultures with C1R.WT in the absence of exogenous Ag $\pm$  SEM. Red line depicts fold-increase = 1 (baseline). Data shown is from  $n = 3$  independent experiments,  $n = 4$  for T26A, each represented by a different coloured dot. **(b)** SKW3. $\beta 2m^{-/-}$  TCR-transduced cell lines were co-cultured with wild type C1R C1R.CD1d in the presence or absence of  $\alpha$ -GalCer (1  $\mu\text{g/mL}$ ), or vehicle control (Veh) together with either anti-CD1d (25  $\mu\text{g/mL}$ ) or isotype control (isotype). The AF7 MAIT SKW3. $\beta 2m^{-/-}$  TCR-transduced cell line and 5-OP-RU (1nM) were also included as controls. Graphs show fold increase in CD69 MFI relative to SKW3. $\beta 2m^{-/-}$  TCR-transduced cell lines in the absence of C1R.CD1d cells, exogenous antigen or antibody  $\pm$  SEM. Red line depicts fold-increase = 1 (baseline). Data shown is from  $n = 3$  independent experiments, each represented by a different coloured dot. The conditions pertaining co-cultures with  $\alpha$ -GalCer and no lipid are also shown in Fig. 2e retaining the same colour-coding.

**Table S1. Data collection and refinement statistics.**

|                                      | <b>T26A NKT TCR-<br/>CD1d-SM</b>                       | <b>T26A NKT TCR-<br/>CD1d-GD3</b>                      |
|--------------------------------------|--------------------------------------------------------|--------------------------------------------------------|
| Data collection                      |                                                        |                                                        |
| Temperature                          | 100K                                                   | 100K                                                   |
| Resolution limits (Å)                | 38.2-2.8 (2.9-2.8)                                     | 45.1-2.5 (2.6-2.5)                                     |
| Space Group                          | P4 <sub>1</sub>                                        | P4 <sub>1</sub>                                        |
| Cell dimensions (Å)                  | <i>a</i> =136.79, <i>b</i> =136.79,<br><i>c</i> =69.80 | <i>a</i> =133.79, <i>b</i> =133.79,<br><i>c</i> =68.57 |
| Total N <sup>o</sup> . observations  | 443095 (56686)                                         | 298286 (31367)                                         |
| N <sup>o</sup> . unique observations | 32086 (4639)                                           | 42283 (4426)                                           |
| Multiplicity                         | 13.8 (12.2)                                            | 7.1 (7.1)                                              |
| Data completeness                    | 100 (100)                                              | 100 (100)                                              |
| Wilson B-factors (Å <sup>2</sup> )   | 66.5                                                   | 49.2                                                   |
| I/σ <sub>I</sub>                     | 7.0 (2.3)                                              | 11.5 (3.70)                                            |
| R <sub>p.i.m</sub> <sup>1</sup> (%)  | 6.4 (25.7)                                             | 3.9 (18.7)                                             |
| Refinement statistics                |                                                        |                                                        |
| R <sub>factor</sub> <sup>2</sup> (%) | 21.7                                                   | 18.6                                                   |
| R <sub>free</sub> <sup>3</sup> (%)   | 25.6                                                   | 23.3                                                   |
| Non hydrogen atoms                   |                                                        |                                                        |
| - Protein                            | 6296                                                   | 6306                                                   |
| - Water                              | 32                                                     | 413                                                    |
| - Heterogen                          | 124                                                    | 152                                                    |
| Ramachandran plot (%)                |                                                        |                                                        |
| - Most favoured                      | 91                                                     | 95                                                     |
| - Allowed                            | 7.8                                                    | 4.8                                                    |
| B-factors (Å <sup>2</sup> )          |                                                        |                                                        |
| - protein                            | 67.7                                                   | 51.4                                                   |
| - ligands                            | 77                                                     | 64.3                                                   |
| rmsd bonds (Å)                       | 0.004                                                  | 0.008                                                  |
| rmsd angles (°)                      | 0.76                                                   | 0.99                                                   |

$$^1 R_{p.i.m} = \sum_{hkl} [1/(N-1)]^{1/2} \sum_i |I_{hkl,i} - \langle I_{hkl} \rangle| / \sum_{hkl} \langle I_{hkl} \rangle.$$

$$^2 R_{factor} = (\sum | |F_o| - |F_c| | ) / (\sum |F_o|) - \text{for all data except as indicated in footnote 3.}$$

<sup>3</sup> 5% of data was used for the R<sub>free</sub> calculation.

Values in parentheses refer to the highest resolution bin.

**Table S2. T26A NKT TCR molecular contacts with and CD1d-SM.**

| TCR gene      | TCR residues                              | CD1d residues                                                                     | Bond type |
|---------------|-------------------------------------------|-----------------------------------------------------------------------------------|-----------|
| CDR1 $\alpha$ | Ser <sup>28</sup>                         | Gln <sup>168</sup>                                                                | VDW       |
| CDR1 $\alpha$ | Gly <sup>29</sup>                         | Gly <sup>164</sup> , Gln <sup>168</sup>                                           | VDW       |
| CDR1 $\alpha$ | Gly <sup>29-N</sup>                       | Gln <sup>168-O<math>\epsilon</math>1</sup>                                        | HB        |
| CDR1 $\alpha$ | Thr <sup>30</sup>                         | Trp <sup>160</sup> , Gly <sup>164</sup> , Thr <sup>165</sup> , Gln <sup>168</sup> | VDW       |
| CDR1 $\alpha$ | Tyr <sup>32</sup>                         | Glu <sup>156</sup> , Trp <sup>160</sup>                                           | VDW       |
| FW $\alpha$   | His <sup>49-N<math>\epsilon</math>2</sup> | Glu <sup>156-O<math>\epsilon</math>2</sup>                                        | HB        |
| CDR2 $\alpha$ | Leu <sup>51</sup>                         | Asn <sup>163</sup> , NAG <sup>278</sup>                                           | VDW       |
| CDR2 $\alpha$ | Thr <sup>52</sup>                         | Asn <sup>163</sup> , NAG <sup>278</sup>                                           | VDW       |
| CDR2 $\alpha$ | Thr <sup>52-N</sup>                       | NAG <sup>278-O</sup>                                                              | HB        |
| CDR2 $\alpha$ | Ser <sup>53</sup>                         | NAG <sup>278</sup>                                                                | VDW       |
| CDR2 $\alpha$ | Ser <sup>53-O<math>\gamma</math></sup>    | NAG <sup>278-O</sup>                                                              | HB        |
| CDR3 $\alpha$ | Gly <sup>93</sup>                         | Trp <sup>160</sup>                                                                | VDW       |
| CDR3 $\alpha$ | Trp <sup>94</sup>                         | Gln <sup>62</sup> , Leu <sup>66</sup> , Trp <sup>160</sup>                        | VDW       |
| CDR3 $\beta$  | Arg <sup>99</sup>                         | Ile <sup>69</sup> , Trp <sup>153</sup> , Thr <sup>157</sup> , Trp <sup>160</sup>  | VDW       |
| CDR3 $\beta$  | Arg <sup>99-N<math>\eta</math>1</sup>     | Thr <sup>157-O<math>\gamma</math>1</sup>                                          | HB        |
| CDR3 $\beta$  | Pro <sup>100</sup>                        | Glu <sup>156</sup>                                                                | VDW       |

HB: Hydrogen bond, VDW: van der Waals,

Cut-off at 4 Å for VDW interactions and 3.5 Å for HB, NAG: N-acetyl-glucosamine.

**Table S3. T26A NKT TCR molecular contacts with and CD1d-GD3.**

| TCR gene      | TCR residues                              | CD1d residues                                                                                                           | Bond type |
|---------------|-------------------------------------------|-------------------------------------------------------------------------------------------------------------------------|-----------|
| CDR1 $\alpha$ | Ser <sup>28</sup>                         | Gln <sup>168</sup>                                                                                                      | VDW       |
| CDR1 $\alpha$ | Gly <sup>29</sup>                         | Gly <sup>164</sup> , Gln <sup>168</sup>                                                                                 | VDW       |
| CDR1 $\alpha$ | Gly <sup>29-N</sup>                       | Gln <sup>168-O<math>\epsilon</math>1</sup>                                                                              | HB        |
| CDR1 $\alpha$ | Thr <sup>30</sup>                         | Trp <sup>160</sup> , Gly <sup>164</sup> , Thr <sup>165</sup>                                                            | VDW       |
| CDR1 $\alpha$ | Thr <sup>30-O</sup>                       | Trp <sup>160-N<math>\epsilon</math>1</sup>                                                                              | HB        |
| CDR1 $\alpha$ | Tyr <sup>32</sup>                         | Glu <sup>156</sup> , Trp <sup>160</sup>                                                                                 | VDW       |
| FW $\alpha$   | His <sup>49</sup>                         | Glu <sup>156</sup>                                                                                                      | VDW       |
| CDR2 $\alpha$ | Leu <sup>51</sup>                         | Trp <sup>160</sup> , Asn <sup>163</sup> , NAG <sup>278</sup>                                                            | VDW       |
| CDR2 $\alpha$ | Thr <sup>52</sup>                         | Asn <sup>163</sup> , NAG <sup>278</sup>                                                                                 | VDW       |
| CDR2 $\alpha$ | Thr <sup>52-N</sup>                       | NAG <sup>278-O</sup>                                                                                                    | HB        |
| CDR2 $\alpha$ | Ser <sup>53</sup>                         | NAG <sup>278</sup>                                                                                                      | VDW       |
| CDR2 $\alpha$ | Ser <sup>53-O<math>\gamma</math></sup>    | NAG <sup>278-O</sup>                                                                                                    | HB        |
| FW $\alpha$   | Glu <sup>66</sup>                         | Asn <sup>108</sup>                                                                                                      | VDW       |
| CDR3 $\alpha$ | Gly <sup>93</sup>                         | Trp <sup>160</sup>                                                                                                      | VDW       |
| CDR3 $\alpha$ | Trp <sup>94</sup>                         | Phe <sup>58</sup> , Gln <sup>62</sup> , Thr <sup>65</sup> , Leu <sup>66</sup> , Trp <sup>160</sup> , Thr <sup>165</sup> | VDW       |
| CDR3 $\alpha$ | Trp <sup>94-N<math>\epsilon</math>1</sup> | Gln <sup>62-N<math>\epsilon</math>2</sup>                                                                               | HB        |
| CDR3 $\beta$  | Arg <sup>99</sup>                         | Ile <sup>69</sup> , Trp <sup>153</sup> , Thr <sup>157</sup> , Trp <sup>160</sup>                                        | VDW       |
| CDR3 $\beta$  | Pro <sup>100</sup>                        | Glu <sup>156</sup>                                                                                                      | VDW       |

HB: Hydrogen bond, VDW: van der Waals,

Cut-off at 4 Å for VDW interactions and 3.5 Å for HB, NAG: N-acetyl-glucosamine.
